# Supplementary material for: Exploring the interplay of semantic knowledge in bilingual children: heritage language and second language
Source: Frontiers journal article supplement (doi:10.3389/flang.2024.1325344), 2024-03-25
Supplement: Table_1.DOCX [file Table_1.DOCX]

Appendix

Sample items

| **Word Association Identification Task (WAID)** | |
| --- | --- |
| Items | **Conditions** |
| **Mouth** Butter **Hand** | Distractor Semantically Unrelated to the Target Pairs |
| **Apple**  Dog **Watermelon** | Distractor Semantically Unrelated to the Target Pairs |
| Purse **Bird Dog** | Distractor Semantically Unrelated to the Target Pairs |
| **Plant Flower** Barbeque | Distractor Semantically Unrelated to the Target Pairs |
| Car **Fox Tiger** | Distractor Semantically Unrelated to the Target Pairs |
| Lemon **Pants Underwear** | Distractor Semantically Unrelated to the Target Pairs |
| **Spoon Fork** Scissors | Distractor Related to the Target Pairs |
| **Ice cream Popsicle** Candy | Distractor Related to the Target Pairs |
| **Pillow Blanket**  Bed | Distractor Related to the Target Pairs |
| **Tiger Cheetah**  Elephant | Distractor Related to the Target Pairs |
| **Dog Cat** Fish | Distractor Related to the Target Pairs |
| **Giraffe** Rabbit **Elephant** | Distractor Related to the Target Pairs |

| **Word Association Task** |
| --- |
| Rice |
| Ball |
| Watermelon |
| Eye |
| Ice cream |
| Pillow |
